# Supplementary material
Source: publisher site journal article supplement (https://www.dovepress.com/article/146496)
Supplement: Supplementary file 1 [file get_supplementary_file.php]

## Supplementary material

### Full search strategy for MEDLINE/PubMed

We searched MEDLINE/PubMed on the 26<sup>th</sup> of May 2015 with the following Medical Subject Heading (MeSH) terms combined as below:

**("Fertility"[Mesh] OR "Infertility, Female"[Mesh] OR "Reproduction"[Mesh] OR "Preconception Care"[Mesh]) OR ("Reproductive Techniques, Assisted"[Mesh]) OR "Reproductive Techniques"[Mesh] AND ("Caffeine/adverse effects"[Mesh] OR "Coffee"[Mesh]) AND ("Case-Control Studies"[Mesh] OR "Cohort Studies"[Mesh])**

Also, a supplementary search was conducted with free text terms in order to include non-indexed new literature.

**(((((coffee) OR "Coffee"[Mesh])) OR (((caffeine) OR "Caffeine"[Mesh])) AND "adverse effects" [Subheading]))) AND ((((((("Reproductive Techniques"[Mesh]) OR "Reproductive Techniques, Assisted"[Mesh]) OR "fertility treatment") OR "Fertility"[Mesh]) OR "Infertility, Female"[Mesh]) OR "Reproduction"[Mesh]) OR "Preconception Care"[Mesh])) AND ((((((("Pregnancy Rate") OR "Pregnancy Rate"[Mesh])) OR ("Birth Rate") OR "Birth Rate"[Mesh])) OR (miscarriage OR "Spontaneous abortion" OR "Abortion, Spontaneous"[Mesh])) OR ("Time-to-Pregnancy") OR "Time-to-Pregnancy"[Mesh]))**

The search was limited to humans and restricted to published data. No restrictions were made according to language or publication period.

The search was repeated on the 3<sup>th</sup> of April 17 – one new article was added to the review

## Data extraction form for systematic review

*"The effects of coffee and caffeine consumption on fecundity and fertility:  
A systematic review and meta-analysis"*

### Article data:

|                                        |  |
|----------------------------------------|--|
| <b>First Author surname</b>            |  |
| <b>Title</b>                           |  |
| <b>Country</b>                         |  |
| <b>Year of publication and journal</b> |  |

### Article content:

|                                              |                                         |
|----------------------------------------------|-----------------------------------------|
| <b>Study design</b>                          |                                         |
| <b>Study population (size and selection)</b> | Study enrollment;                       |
| <b>Inclusion criteria (selection)</b>        |                                         |
| <b>Exclusion criteria</b>                    |                                         |
| <b>Assessment of intake (X)</b>              | Prospective (before conception/SAB)     |
|                                              | Retrospective                           |
| <b>Method of assessment of exposure (X)</b>  | Questionnaires                          |
|                                              | Interview                               |
|                                              | Blood samples                           |
| <b>Assessment of exposure/caffeine (X)</b>   | Based on total/multiple dietary factors |
|                                              | Based just on coffee                    |
| <b>Assessment of outcome</b>                 |                                         |
| <b>Confounder control</b>                    |                                         |
| <b>Results</b>                               |                                         |

### Conclusion:

|                                  |  |
|----------------------------------|--|
| <b>Effect - estimate (X)</b>     |  |
| <b>Nonsignificant effect (X)</b> |  |

|                        |  |                   |
|------------------------|--|-------------------|
| <b>Limitations (X)</b> |  | Small sample size |
|                        |  | Selection bias    |
|                        |  | Information bias  |
|                        |  | Confounding       |

**Quality scoring (NOS)**

| Selection |   |   |   | Comparability | Exposure (CC) or Outcome (Cohort) |   |   |
|-----------|---|---|---|---------------|-----------------------------------|---|---|
| 1         | 2 | 3 | 4 | 1             | 1                                 | 2 | 3 |
|           |   |   |   |               |                                   |   |   |

## NOS explanatory form

### 1) Cohort studies

#### Selection

- 1) a \* is awarded if the exposed cohort is a) “truly representative” or b) “somewhat representative” of the average coffee drinking women of the fertile age.  
Obs. “volunteers” does NOT mean volunteering/accepting to participate in a well-defined study. Volunteering would be the case for instance if participants answered an add in the newspaper.
- 4) Both in the case of prospectively and retrospectively collected data a \* is only awarded if a viable pregnancy is demonstrated at the time of the interview by either 2 consecutive increased hCG-tests or a positive ultrasound.

#### Comparability

- 1) either adjustment or stratification is considered adequate for awarding a \*

#### Outcome

- 1) Most fecundability studies rely on self-report → will not be awarded a \*
- 3)
  - b) subjects lost to follow up > 80% i.e. if > 80% of eligible women are included and followed or description provided of those lost, a \* is awarded
  - c) if <80% of eligible women are included and no description of those lost
  - d) if no statement of number or % of eligible women is provided

### 2) Case-control studies

#### Selection

- 1) “independent validation” i.e. 1) data from medical records or 2) self-reports subsequently validated by checking e.g. medical records, is awarded a \*
- 2) “obviously representative series of cases” – if cases are obviously selected e.g. women with diabetes, the study will NOT be awarded a \*. Also if the eligible number of women is not known, a \* will NOT be awarded.
- 3) - “community controls” equals uncomplicated pregnancies (i.e. pregnancies without experiencing SAB at the point of data collection) - most women are involved with hospital facilities at some point during pregnancy, but this does not label them “hospital controls”
- 4) if controls are pregnant women with normal deliveries they can per se not have the outcome/SAB and in that case a \* will be awarded

#### Comparability

- 1) Either adjustment (including matching) or stratification is considered adequate for awarding a \*

#### Exposure

- 1 b)\* if awarded a \* it must be explicitly stated that the interviewer(s) were blinded to case/control status

## **Elaborated reasons for exclusion**

### **Medline + Embase search:**

- The computerized literature search resulted n=378 citations (Medline: n=140 and Embase: n=238)
- Duplicates in the two databases, n=90
- Repeated database search, n=1
- From Medline and Embase search in total included, **n= 289**

### **Reference list search:**

- Potential unique citations n=68
- Duplicates (i.e. included in the search from Medline and Embase), n=46
- From search in reference lists in total included, **n=21**

### **Total number of unique records identified, n=311**

### **Exclusion of non-relevant records based on title and abstract, n=195**

### **Unique full-text articles assessed for eligibility, n=116**

#### **Full-text articles excluded due to, n=68;**

- reporting exposure assessment after outcome (Stanton et al. 1995<sup>1</sup>; Hatch et al. 1993<sup>2</sup>; Williams et al. 1990<sup>3</sup>), n=3
- not clearly stating whether exposure information refers to the time-period before or after the outcome occurred, (we have tried to contact the authors but either the contact information was not valid or the authors did not reply on our request) (Curtis et al. 1997<sup>4</sup>; Hansteen et al. 1990<sup>5</sup>; Joesoef et al. 1990<sup>6</sup>; Hassan et al. 2004<sup>7</sup>; Weathersbee et al. 1977<sup>8</sup>), n=5
- not reporting the outcome of interest. Instead reporting; fetal dead (Matijasevich et al. 2006<sup>9</sup>), stillbirth (Wisborg et al. 2003<sup>10</sup>), "SAB" > gestational week 24(=stillbirth) (Furuhashi et al. 1985<sup>11</sup>), ovulatory disorder infertility (Chavarro et al. 2009<sup>12</sup>) + others (Grodstein et al. 1993<sup>13</sup>), n=5
- not reporting exposure as caffeine/cups of coffee, but instead reporting s-paraxanthine (Klebanoff et al. 1999<sup>14</sup>), coffee and tea together without an numerical coffee value (Huang et al. 2012<sup>15</sup>) or only caffeine from the medication letigen (Howards et al. 2012<sup>16</sup>) n=3
- not reporting an exposure of interest (Ferreira et al. 2010<sup>17</sup>; Halpern et al. 2010<sup>18</sup>; Anderson et al. 2009<sup>19</sup>; Killick et al. 2009<sup>20</sup>; Taylor et al. 2009<sup>21</sup>; Karypidis et al. 2006<sup>22</sup>; Fenster et al. 1998<sup>23</sup>), n=7
- not reporting an effect estimate and not providing data for us to calculate an effect estimate (Watkinson et al. 1985<sup>24</sup>; Tebbutt et al. 1984<sup>25</sup>), n=2

- reporting stratified results using data from the study by Cnattingius et al. 2000 = replication of data in another publication (Signorello et al. 2001<sup>26</sup>) + (Agnesi et al. 2003<sup>27</sup>), n=2

- review (Lassi et al. 2014<sup>28</sup>; Rooney et al. 2014<sup>29</sup>; Gupta et al. 2013<sup>30</sup>; Morgan et al. 2013<sup>31</sup>; Mmbaga et al. 2012<sup>32</sup>; Heidaryfard et al. 2012<sup>33</sup>; Brent et al. 2011<sup>34</sup>; Sadeu et al. 2010<sup>35</sup>; Kuczkowski et al. 2009<sup>36</sup>; Scott et al. 2009<sup>37</sup>; Signorello et al. 2004<sup>38</sup>; Nawrot et al. 2003<sup>39</sup>; Christian et al. 2001<sup>40</sup>; Hinds et al. 1996<sup>41</sup>; Narod et al. 1991<sup>42</sup>; Leviton et al 1988<sup>43</sup>; Heller et al. 1987<sup>44</sup>), n=17

- reporting replies (Kuczkowski et al. 2010<sup>45</sup>; Graham et al. 2008<sup>46</sup>; Lynch et al. 2008<sup>47</sup>; Signorello et al. 2008<sup>48</sup>; Armstrong et al. 2008<sup>49</sup>; Chura et al. 2007<sup>50</sup>; Lawson et al. 2004<sup>51</sup>; Cnattingius et al. 2003<sup>52</sup>; Olsen et al. 2001<sup>53</sup>; Gilbert-Barness et al. 2000<sup>54</sup>; Jester et al. 2000<sup>55</sup>; Eskenazi et al. 1999<sup>56</sup>; Robertson et al. 1998<sup>57</sup>; Parazzini et al. 1994<sup>58</sup>; Kline et al. 1994<sup>59</sup>; Wei et al. 1994<sup>60</sup>; Fenster et al. 1991<sup>61</sup>; Stein et al. 1991<sup>62</sup>), n=18

- only available abstract and not full text article (Nouri et al. 2013<sup>63</sup>; Kesmodel et al. 2012<sup>64</sup>; Pauli et al. 2010<sup>65</sup>; Imaz et al. 2009<sup>66</sup>; Gilbert et al. 2008<sup>67</sup>), n=5

- article not available from Nordic libraries (Hrubá et al. 1997<sup>68</sup>), n=1

#### **Excluded from the review after assessing data-quality, n=1**

- Spinelli et al. 1997<sup>69</sup> – not reporting sufficient data for inclusion in the meta-analysis AND when trying to calculate crude OR based on numbers from the article, the results becomes remarkably different as compared with the crude OR reported in the article – thus, we cannot be sure which estimates to believe in and thus the study has to be excluded from the review in general

#### **Studies included in the review, n=47**

##### **Studies excluded from the meta-analysis (n=12)**

- Due to not reporting sufficient information on number of cases and/or number of subjects and not replying sufficiently on mail correspondence

Fecundity studies (Wilcox et al. 1988<sup>70</sup>; Christianson et al. 1989<sup>71</sup>; Florack et al. 1994<sup>72</sup>; Bolumar et al. 1997<sup>73</sup>; Jensen et al. 1998<sup>74</sup>; Pollack et al. 2010<sup>75</sup>; Taylor et al. 2011<sup>76</sup>), n=7  
SAB studies (Axelsson et al. 1989<sup>77</sup>; Stefanidou et al. 2011<sup>78</sup>), n=2

- Due to not reporting more than two estimates (the reference group and only one additional estimate) and thus not being able to contribute to a dose-response meta-analysis (Parazzini et al. 1991<sup>79</sup>; Lubna et al. 1994<sup>80</sup>; Khoury et al. 2004<sup>81</sup>), n=3

##### **Studies included in the meta-analysis, n=35**

**Table S1a – Characteristics and risk of bias table for publications on coffee/caffeine and fecundity**

| Author and year                        | Country     | Design | Source of caffeine | Risk of bias |               |                  |                 |
|----------------------------------------|-------------|--------|--------------------|--------------|---------------|------------------|-----------------|
|                                        |             |        |                    | Selection    | Comparability | Exposure/outcome | Total NOS-score |
| Wilcox et al. 1988 <sup>70</sup>       | US          | Cohort | Multiple           | **           | **            | **               | 6               |
| Christianson et al. 1989 <sup>71</sup> | US          | Cohort | Coffee             | **           | *             | *                | 4               |
| Olsen et al. 1991 <sup>82</sup>        | Denmark     | Cohort | Multiple           | **           | **            | **               | 6               |
| Florack et al. 1994 <sup>72</sup>      | Netherlands | Cohort | Coffee             | ****         | *             | **               | 7               |
| Alderete et al. 1995 <sup>83</sup>     | US          | Cohort | Coffee             | ***          | **            | **               | 7               |
| Bolúmar et al. 1997 <sup>73</sup>      | Spain       | Cohort | Multiple           | ***          | **            | *                | 6               |
| Caan et al. 1998 <sup>84</sup>         | US          | Cohort | Multiple /Coffee   | **           | **            | **               | 6               |
| Hakim et al. 1998 <sup>85</sup>        | US          | Cohort | Coffee             | ***          | **            | **               | 7               |
| Jensen et al. 1998 <sup>74</sup>       | Denmark     | Cohort | Multiple /Coffee   | ***          | *             | *                | 5               |
| Pollack et al. 2010 <sup>75</sup>      | US          | Cohort | Multiple           | ***          | **            | **               | 7               |
| Taylor et al. 2011 <sup>76</sup>       | US          | Cohort | Multiple           | ***          | **            | *                | 6               |
| Hatch et al. 2012 <sup>86</sup>        | US          | Cohort | Multiple /Coffee   | ***          | **            | *                | 6               |

In each category (i.e. selection, comparability and exposure/outcome) a range of zero to three \* could be awarded. The maximum total NOS-score is 9.

**Table S1b – Characteristics and risk of bias table for publications on caffeine and spontaneous abortion (SAB)**

| Author and year                           | Country      | Design       | Source of caffeine | Risk of bias |               |                  |                 |
|-------------------------------------------|--------------|--------------|--------------------|--------------|---------------|------------------|-----------------|
|                                           |              |              |                    | selection    | comparability | Exposure/outcome | Total NOS-score |
| Srisuphan et al. 1986 <sup>87</sup>       | US           | Cohort       | Multiple           | ***          | *             | **               | 6               |
| Axelsson et al. 1989 <sup>77</sup>        | Sweden       | Cohort       | Coffee             | *            | *             | ***              | 5               |
| Wilcox et al. 1990 <sup>88</sup>          | US           | Cohort       | Multiple           | ***          | *             | **               | 6               |
| Fenster et al. 1991 <sup>89</sup>         | US           | Case-control | Multiple           | ***          | **            | **               | 7               |
| Kline et al. 1991 <sup>90</sup>           | US           | Case-control | Multiple           | ***          | *             | **               | 6               |
| Parazzini et al. 1991 <sup>79</sup>       | Italy        | Case-control | Coffee             | ****         | *             | *                | 6               |
| Armstrong et al. 1992 <sup>91</sup>       | US           | Cohort       | Coffee             | ***          | **            | *                | 6               |
| Infante-Rivard et al. 1993 <sup>92</sup>  | Canada       | Case-control | Coffee             | ****         | **            | *                | 7               |
| Mills et al. 1993 <sup>93</sup>           | US           | Cohort       | Multiple           | ***          | **            | ***              | 8               |
| Dominguez-Rojas et al. 1994 <sup>94</sup> | Spain        | Cohort       | Coffee             | **           | *             | **               | 5               |
| Lubna et al. 1994 <sup>80</sup>           | Saudi Arabia | Case-control | Multiple           | ****         |               | *                | 5               |
| Dlugosz et al. 1996 <sup>95</sup>         | US           | Cohort       | Multiple /Coffee   | ***          | **            | ***              | 8               |
| Zhang et al. 1996 <sup>96</sup>           | US           | Cohort       | Coffee             | **           |               | *                | 3               |
| Agnesi et al. 1997 <sup>97</sup>          | Italy        | Case-control | Coffee             | ***          | **            | *                | 6               |
| Fenster et al. 1997 <sup>98</sup>         | US           | Cohort       | Multiple           | **           | **            | ***              | 7               |
| Parazzini et al. 1998 <sup>99</sup>       | Italy        | Case-control | Coffee             | ****         | **            | **               | 8               |
| Cnattingius et al. 2000 <sup>100</sup>    | Sweden       | Case-control | Multiple           | ****         | **            | **               | 8               |
| Wen et al. 2001 <sup>101</sup>            | US           | Cohort       | Multiple           | *            |               | **               | 3               |
| Giannelli et al. 2003 <sup>102</sup>      | UK           | Case-control | Multiple           | ***          | *             | **               | 6               |
| Rasch et al. 2003 <sup>103</sup>          | Denmark      | Case-control | Multiple           | ****         | **            | **               | 8               |
| Tolstrup et al. 2003 <sup>104</sup>       | Denmark      | Case-control | Multiple           | ***          | **            | *                | 6               |



|                                       |         |              |                  |  |      |    |     |   |
|---------------------------------------|---------|--------------|------------------|--|------|----|-----|---|
| Khoury et al. 2004 <sup>81</sup>      | US      | Cohort       | Multiple         |  | **   | *  | *   | 4 |
| Bech et al. 2005 <sup>105</sup>       | Denmark | Cohort       | Coffee           |  | ***  | ** | **  | 7 |
| Sata et al. 2005 <sup>106</sup>       | Japan   | Case-control | Multiple         |  | ***  | *  | **  | 6 |
| George et al. 2006 <sup>107</sup>     | Sweden  | Case-control | Multiple         |  | **** | ** | **  | 8 |
| Maconochie et al. 2007 <sup>108</sup> | UK      | Case-control | Multiple         |  | ***  | *  | *   | 5 |
| Savitz et al. 2008 <sup>109</sup>     | US      | Cohort       | Multiple /Coffee |  | ***  | ** | *** | 8 |
| Weng et al. 2008 <sup>110</sup>       | US      | Cohort       | Multiple /Coffee |  | ***  | ** | *   | 6 |
| Agnesi et al. 2010 <sup>111</sup>     | Italy   | Case-control | Coffee           |  | ***  | *  | *   | 5 |
| Greenwood et al. 2010 <sup>112</sup>  | UK      | Cohort       | Multiple /Coffee |  | ***  | ** | *** | 8 |
| Pollack et al. 2010 <sup>75</sup>     | US      | Cohort       | Coffee           |  | ***  | ** | *   | 6 |
| Stefanidou et al. 2011 <sup>78</sup>  | Italy   | Case-control | Multiple         |  | **** | ** | *   | 7 |
| Hanh et al. 2015 <sup>113</sup>       | Denmark | Cohort       | Multiple /Coffee |  | **   | ** | *** | 7 |

In each category (i.e. selection, comparability and exposure/outcome) a range of zero to three \* could be awarded. The maximum total NOS-score is 9.

**Table S1c – Characteristics and risk of bias table for publications on caffeine and Medically Assisted Reproduction (MAR)**

| Author and year                          | Country      | Design | Source of caffeine | Risk of bias |               |                  |                 |
|------------------------------------------|--------------|--------|--------------------|--------------|---------------|------------------|-----------------|
|                                          |              |        |                    | Selection    | Comparability | Exposure/outcome | Total NOS-score |
| Klonoff-Cohen et al. 2002 <sup>114</sup> | US           | Cohort | Multiple           | ***          | **            | **               | 7               |
| Iman Al-Saleh et al. 2010 <sup>115</sup> | Saudi Arabia | Cohort | Multiple /Coffee   | ***          | **            | **               | 7               |
| Choi et al. 2011 <sup>116</sup>          | US           | Cohort | Multiple           | ***          | **            | **               | 7               |

In each category (i.e. selection, comparability and exposure/outcome) a range of zero to three \* could be awarded. The maximum total NOS-score is 9.

1. Stanton CK, Gray RH. Effects of caffeine consumption on delayed conception. 1995(0002-9262 (Print)).
2. Hatch EE, Bracken MB. Association of delayed conception with caffeine consumption. *American Journal of Epidemiology*. 1993;138(12):1082-1092.
3. Williams MA, Monson RR, Goldman MB, Mittendorf R, Ryan KJ. Coffee and delayed conception. *Lancet*. 1990;335(8705):1603.
4. Curtis KM, Savitz DA, Arbuckle TE. Effects of cigarette smoking, caffeine consumption, and alcohol intake on fecundability. Vol 1461997:32-41.
5. Hansteen IL. Occupational and lifestyle factors and chromosomal aberrations of spontaneous abortions. 1990(0361-7742 (Print)).
6. Joesoef MR, Beral V, Rolfs RT, Aral SO, Cramer DW. Are caffeinated beverages risk factors for delayed conception? *Lancet*. 1990;335(8682):136-137.
7. Hassan MA, Killick SR. Negative lifestyle is associated with a significant reduction in fecundity. 2004(0015-0282 (Print)).
8. Weathersbee Ps Fau - Olsen LK, Olsen Lk Fau - Lodge JR, Lodge JR. Caffeine and pregnancy. A retrospective survey. 1977(0032-5481 (Print)).
9. Matijasevich A, Barros FC, Santos IS, Yemini A. Maternal caffeine consumption and fetal death: a case-control study in Uruguay. *Paediatr Perinat Epidemiol*. 2006;20(2):100-109.
10. Wisborg K, Kesmodel U, Bech BH, Hedegaard M, Henriksen TB. Maternal consumption of coffee during pregnancy and stillbirth and infant death in first year of life: prospective study. *BMJ*. 2003;326(7386):420.
11. Furuhashi NS, S.; Suzuki, M.; Hiruta, M.; Tanaka, M.; Takahashi, T. Effects of caffeine ingestion during pregnancy. 1985(0378-7346 (Print)).

12. Chavarro JE, Rich-Edwards JW, Rosner BA, Willett WC. Caffeinated and alcoholic beverage intake in relation to ovulatory disorder infertility. Vol 202009:374-381.
13. Grodstein F, Goldman MB, Ryan L, Cramer DW. Relation of female infertility to consumption of caffeinated beverages. *American Journal of Epidemiology*. 1993;137(12):1353-1360.
14. Klebanoff MA, Levine Rj Fau - DerSimonian R, DerSimonian R Fau - Clemens JD, Clemens Jd Fau - Wilkins DG, Wilkins DG. Maternal serum paraxanthine, a caffeine metabolite, and the risk of spontaneous abortion. 1999(0028-4793 (Print)).
15. Huang H, Hansen Kr Fau - Factor-Litvak P, Factor-Litvak P Fau - Carson SA, et al. Predictors of pregnancy and live birth after insemination in couples with unexplained or male-factor infertility. 2012(1556-5653 (Electronic)).
16. Howards PP, Hertz-Picciotto I, Bech BH, et al. Spontaneous abortion and a diet drug containing caffeine and ephedrine: a study within the Danish national birth cohort. *PLoS One*. 2012;7(11):e50372.
17. Ferreira RC, Halpern G, Figueira Rde C, Braga DP, Iaconelli A, Jr., Borges E, Jr. Physical activity, obesity and eating habits can influence assisted reproduction outcomes. *Womens Health (Lond)*. 2010;6(4):517-524.
18. Halpern G, Ferreira RC, Braga DPAF, et al. Lifestyle factors and eating habits influence on intracytoplasmic sperm injection cycles outcomes. *Journal of Reproductionmedizin und Endokrinologie*. 2010;7:4:287.
19. Anderson BL, Juliano LM, Schulkin J. Caffeine's implications for women's health and survey of obstetrician-gynecologists' caffeine knowledge and assessment practices. *J Womens Health (Larchmt)*. 2009;18(9):1457-1466.
20. Killick S, Trussell J, Cleland K, Moreau C. Factors associated with subfertility among women attending an antenatal clinic in Hull. *Human fertility (Cambridge, England)*. 2009;12(4):191-197.
21. Taylor KC, Murray LE, Small CM, et al. NAT2 haplotypes modify the effects of smoking, alcohol, and caffeine on fertility *Genetic Epidemiology* 2009;33:8:776.
22. Karypidis AH, Soderstrom T Fau - Nordmark A, Nordmark A Fau - Granath F, Granath F Fau - Cnattingius S, Cnattingius S Fau - Rane A, Rane A. Association of cytochrome P450 1B1 polymorphism with first-trimester miscarriage. 2006(1556-5653 (Electronic)).
23. Fenster L, Quale C, Hiatt RA, Wilson M, Windham GC, Benowitz NL. Rate of caffeine metabolism and risk of spontaneous abortion. *Am J Epidemiol*. 1998;147(5):503-510.
24. Watkinson B Fau - Fried PA, Fried PA. Maternal caffeine use before, during and after pregnancy and effects upon offspring. 1985(0275-1380 (Print)).
25. Tebbutt Ih Fau - Teare AJ, Teare Aj Fau - Meek JH, Meek Jh Fau - Mallett KA, Mallett Ka Fau - Hawkins DF, Hawkins DF. Caffeine, theophylline and theobromine in pregnancy. 1984 (0724-438X (Print)).
26. Signorello LB, Nordmark A Fau - Granath F, Granath F Fau - Blot WJ, et al. Caffeine metabolism and the risk of spontaneous abortion of normal karyotype fetuses. 2001(0029-7844 (Print)).
27. Agnesi R, Valentini F, Meneghetti M, et al. [Changes in risk factors for spontaneous abortion in an area with high concentrations of shoe manufacture after a preventive intervention]. *G Ital Med Lav Ergon*. 2003;25 Suppl(3):79-80.

28. Lassi ZS, Imam AM, Dean SV, Bhutta ZA. Preconception care: caffeine, smoking, alcohol, drugs and other environmental chemical/radiation exposure. *Reprod Health*. 2014;11 Suppl 3:S6.
29. Rooney KL, Domar AD. The impact of lifestyle behaviors on infertility treatment outcome. *Curr Opin Obstet Gynecol*. 2014;26(3):181-185.
30. Gupta S, Fedor J, Biiedenharn K, Agarwal A. Lifestyle factors and oxidative stress in female infertility: Is there an evidence base to support the linkage? . *Expert Review of Obstetrics an Gynecology*. 2013;8:6:607-624.
31. Morgan S, Koren G, Bozzo P. Is caffeine consumption safe during pregnancy? *Can Fam Physician*. 2013;59(4):361-362.
32. Mmbaga N, Luk J. The impact of preconceptual diet on the outcome of reproductive treatments. *Current opinion in obstetrics & gynecology*. 2012;24(3):127-131.
33. Heidaryfard S, Heshmaty A. Evaluating the raelationship between infertility and nutrition. *International Journal of Fertility and Sterility*. 2012;6 SUPPL. 1 (110).
34. Brent RL, Christian MS, Diener RM. Evaluation of the reproductive and developmental risks of caffeine. *Birth Defects Res B Dev Reprod Toxicol*. 2011;92(2):152-187.
35. Sadeu JC, Hughes CL, Agarwai S, Foster WG. Alcohol, drugs, caffeine, tobacco, and environmental contaminant exposure: Reproductive health consequences and clinical implications. *Critical Reviews in Toxicology*. 2010;40:7:633-652.
36. Kuczkowski KM. Caffeine in pregnancy. *Arch Gynecol Obstet*. 2009;280(5):695-698.
37. Scott JS. Effects of restricted caffeine intake by mother on fetal, neonatal, and pregnancy outcome. *Obstetrics and Gynecology*. 2009;114:1 161-162.
38. Signorello LB, McLaughlin JK. Maternal caffeine consumption and spontaneous abortion: a review of the epidemiologic evidence. *Epidemiology*. 2004;15(2):229-239.
39. Nawrot P, Jordan S, Eastwood J, Rotstein J, Hugenholtz A, Feeley M. Effects of caffeine on human health. *Food Addit Contam*. 2003;20(1):1-30.
40. Christian MS, Brent RL. Teratogen update: evaluation of the reproductive and developmental risks of caffeine. *Teratology*. 2001;64(1):51-78.
41. Hinds TS, West WL, Knight EM, Harland BF. The effect of caffeine on pregnancy outcome variables. *Nutr Rev*. 1996;54(7):203-207.
42. Narod SA, De Sanjose S, Victora C. Coffee during pregnancy: a reproductive hazard? *Am J Obstet Gynecol*. 1991;164(4):1109-1114.
43. Leviton A. Caffeine consumption and the risk of reproductive hazards. *J Reprod Med*. 1988;33(2):175-178.
44. Heller J. What do we know about the risks of caffeine consumption in pregnancy? *Br J Addict*. 1987;82(8):885-889.
45. Kuczkowski KM. The potential dangers of caffeine in pregnancy. *Acta Anaesthesiol Scand*. 2010;54(4):524-525.
46. Graham NA, Hammond CJ, 3rd, Gold MS. Caffeine in miscarriages: it's not just in the coffee. *Am J Obstet Gynecol*. 2008;199(5):e15.
47. Lynch CD, Klebanoff MA, Louis GM. Is caffeine use during pregnancy really unsafe? *Am J Obstet Gynecol*. 2008;199(5):e16.
48. Signorello LB, McLaughlin JK. Caffeine and miscarriage: case closed? *Am J Obstet Gynecol*. 2008;199(5):e14-15.
49. Armstrong E, Harris LH, Kukla R, et al. Maternal caffeine consumption during pregnancy and the risk of miscarriage. *Am J Obstet Gynecol*. 2008;199(5):e13; author reply e13-14.

50. Chura LR, Norman RJ. Impact of lifestyle factors on ovarian function and reproductive health in women. *Womens Health (Lond)*. 2007;3(5):511-513.
51. Lawson CC, LeMasters GK. Caffeine and spontaneous abortion. *Epidemiology*. 2004;15(5):646.
52. Cnattingius S, Ekblom A, Granath F, Rane A. Caffeine intake and the risk of spontaneous abortion. *Food Chem Toxicol*. 2003;41(8):1202; author reply 1203.
53. Olsen J, Obel C, Bech BH, Andersen AM. [Should we advice pregnant women not to intake coffee and other products containing caffeine?]. *Ugeskr Laeger*. 2001;163(10):1444.
54. Gilbert-Barness E. Maternal caffeine and its effect on the fetus. *Am J Med Genet*. 2000;93(3):253.
55. Jester DM, Grant MM. Caffeine consumption and the risk of spontaneous abortions. *J Fam Pract*. 2000;49(3):204-205.
56. Eskenazi B. Caffeine--filtering the facts. *N Engl J Med*. 1999;341(22):1688-1689.
57. Robertson J, Feldkamp M, Jennings J, Leen-Mitchell M, Martinez L, Carey JC. Maternal alcohol and caffeine consumption and spontaneous abortion. *Epidemiology*. 1998;9(5):583-584.
58. Parazzini F, Chatenoud L, La Vecchia C. Fetal loss and caffeine intake. *JAMA*. 1994;272(1):28-29.
59. Kline J, Levin B, Kinney A, Stein Z, Susser M, Warburton D. Fetal loss and caffeine intake. *JAMA*. 1994;272(1):27-28; author reply 28-29.
60. Wei M. Fetal loss and caffeine intake. *JAMA*. 1994;272(1):27; author reply 28-29.
61. Fenster L, Windham GC, Swan SH, Eskenazi B. Miscarriage, caffeine, and the epiphenomena of pregnancy: the causal model. *Epidemiology*. 1991;2(4):313.
62. Stein Z, Susser M. Miscarriage, caffeine, and the epiphenomena of pregnancy: the causal model. *Epidemiology*. 1991;2(3):163-167.
63. Nouri K, Reitner H, Rothensteiner M. Lifestyle factors and their influence on tomie to conceive in women in and around Vienna. *Geburtshilfe und Frauenheilkunde*. 2013;73:5.
64. Kesmodel US, Christensen MW, Degn B, Ingerslev HJ. Does coffee consumption reduce the chance of pregnancy and live birth in IVF. *Human Reproduction*. 2012;27 SUPPL. 2.
65. Pauli SA, Browne AC, Seydafkan S, Session DR. Counseling patients regarding reducing caffeine consumption before in vitro fertilization (IVF) is associated with decreased number of immature oocytes. *Fertility and Sterility*. 2010;94:4 SUPPL. 1 (S262).
66. Imaz M, Gelabert E, García-Esteve LL, et al. Substance use during pregnancy and child outcomes: A longitudinal study. *European Neuropsychopharmacology*. 2009;19 SUPPL. 3 (S674).
67. Gilbert G. Caffeine associated with miscarriage. *Journal of the National Medical Association*. 2008;100:7 (870).
68. Hrubá D, Kachlik P. Coffee consumption and frequency of reproductive disorders. *Prakticky Lekar*. 1997;77:10:491-493.
69. Spinelli A, Figa-Talamanca I, Osborn J. Time to pregnancy and occupation in a group of Italian women. *International journal of epidemiology*. 1997;26(3):601-609.
70. Wilcox A, Weinberg C, Baird D. Caffeinated beverages and decreased fertility. *Lancet*. 1988;2(8626-8627):1453-1456.
71. Christianson RE, Oechsli FW, Berg BJ. Caffeinated beverages and decreased fertility. *Lancet*. 1989;1(8634):378.

72. Florack EI, Zielhuis GA, Rolland R. Cigarette smoking, alcohol consumption, and caffeine intake and fecundability. *Preventive medicine*. 1994;23(2):175-180.
73. Bolumar F, Olsen J, Rebagliato M, Bisanti L. Caffeine intake and delayed conception: a European multicenter study on infertility and subfecundity. European Study Group on Infertility Subfecundity. *American Journal of Epidemiology*. 1997;145(4):324-334.
74. Jensen TK, Henriksen TB, Hjollund NH, et al. Caffeine intake and fecundability: a follow-up study among 430 Danish couples planning their first pregnancy. *Reproductive toxicology (Elmsford, NY)*. 1998;12(3):289-295.
75. Pollack AZ, Buck Louis GM, Sundaram R, Lum KJ. Caffeine consumption and miscarriage: a prospective cohort study. *Fertil Steril*. 2010;93(1):304-306.
76. Taylor KC, Small CM, Dominguez CE, et al. alcohol, smoking, and caffeine in relation to fecundability, with effect modification by NAT2. *Ann Epidemiol*. 2011;21(11):864-872.
77. Axelsson G, Rylander R. Outcome of Pregnancy in Women Engaged in Laboratory Work at a Petrochemical Plant. *American Journal of Industrial Medicine*. 1989;16(5):539-545.
78. Stefanidou EM, Caramellino L, Patriarca A, Menato G. Maternal caffeine consumption and sine causa recurrent miscarriage. *Eur J Obstet Gynecol Reprod Biol*. 2011;158(2):220-224.
79. Parazzini F, Bocciolone L, Fedele L, Negri E, La Vecchia C, Acaia B. Risk factors for spontaneous abortion. *Int J Epidemiol*. 1991;20(1):157-161.
80. Lubna A Al-Ansary ZAB. Risk Factors for Spontaneous Abortion: A Preliminary Study on Saudi Women. *J Roy Soc Health*. 1994(August):188-193.
81. Khoury JC, Miodovnik M, Buncher CR, et al. Consequences of smoking and caffeine consumption during pregnancy in women with type 1 diabetes. *J Matern Fetal Neonatal Med*. 2004;15(1):44-50.
82. Olsen J. Cigarette smoking, tea and coffee drinking, and subfecundity. *American Journal of Epidemiology*. 1991;133(7):734-739.
83. Alderete E, Eskenazi B, Sholtz R. Effect of cigarette smoking and coffee drinking on time to conception. *Epidemiology (Cambridge, Mass)*. 1995;6(4):403-408.
84. Caan B, Quesenberry CP, Jr., Coates AO. Differences in fertility associated with caffeinated beverage consumption. *American Journal of Public Health*. 1998;88(2):270-274.
85. Hakim RB, Gray RH, Zacur H. Alcohol and caffeine consumption and decreased fertility. Vol 70 1998:632-637.
86. Hatch EE, Wise LA, Mikkelsen EM, et al. Caffeinated beverage and soda consumption and time to pregnancy. *Epidemiology (Cambridge, Mass)*. 2012;23(3):393-401.
87. Srisuphan WF, Bracken MB. Caffeine consumption during pregnancy and association with late spontaneous abortion. 1986(0002-9378 (Print)).
88. Wilcox AJ, Weinberg CR, Baird DD. Risk factors for early pregnancy loss. *Epidemiology*. 1990;1(5):382-385.
89. Fenster L, Eskenazi B, Windham GC, Swan SH. Caffeine consumption during pregnancy and spontaneous abortion. *Epidemiology*. 1991;2(3):168-174.
90. Kline J, Levin B, Silverman J, et al. Caffeine and spontaneous abortion of known karyotype. *Epidemiology*. 1991;2(6):409-417.
91. Armstrong BG, McDonald AD, Sloan M. Cigarette, alcohol, and coffee consumption and spontaneous abortion. *Am J Public Health*. 1992;82(1):85-87.
92. Infante-Rivard CF, A.; Gauthier, R.; David, M.; Rivard, G. E. Fetal loss associated with caffeine intake before and during pregnancy. 1993(0098-7484 (Print)).

93. Mills JL, Holmes LB, Aarons JH, et al. Moderate Caffeine Use and the Risk of Spontaneous-Abortion and Intrauterine Growth-Retardation. *Jama-Journal of the American Medical Association*. 1993;269(5):593-597.
94. Dominguez-Rojas VdJ-P, J. R.; Astasio-Arbiza, P.; Ortega-Molina, P.; Gordillo-Florencio, E. Spontaneous abortion in a hospital population: are tobacco and coffee intake risk factors? *Eur J Epidemiol*. 1994;10(6):665-668.
95. Dlugosz L, Belanger K, Hellenbrand K, Holford TR, Leaderer B, Bracken MB. Maternal caffeine consumption and spontaneous abortion: a prospective cohort study. *Epidemiology*. 1996;7(3):250-255.
96. Zhang H, Bracken MB. Tree-based, two-stage risk factor analysis for spontaneous abortion. *Am J Epidemiol*. 1996;144(10):989-996.
97. Agnesi R, Valentini F, Mastrangelo G. Risk of spontaneous abortion and maternal exposure to organic solvents in the shoe industry. *Int Arch Occup Environ Health*. 1997;69(5):311-316.
98. Fenster L, Hubbard AE, Swan SH, et al. Caffeinated beverages, decaffeinated coffee, and spontaneous abortion. *Epidemiology*. 1997;8(5):515-523.
99. Parazzini F, Chatenoud L, Di Cintio E, et al. Coffee consumption and risk of hospitalized miscarriage before 12 weeks of gestation. *Human Reproduction*. 1998;13(8):2286-2291.
100. Cnattingius S, Signorello LB, Anneren G, et al. Caffeine intake and the risk of first-trimester spontaneous abortion. *N Engl J Med*. 2000;343(25):1839-1845.
101. Wen W, Shu XO, Jacobs DR, Jr., Brown JE. The associations of maternal caffeine consumption and nausea with spontaneous abortion. *Epidemiology*. 2001;12(1):38-42.
102. Giannelli M, Doyle P, Roman E, Pelerin M, Hermon C. The effect of caffeine consumption and nausea on the risk of miscarriage. *Paediatr Perinat Epidemiol*. 2003;17(4):316-323.
103. Rasch V. Cigarette, alcohol, and caffeine consumption: risk factors for spontaneous abortion. *Acta Obstet Gynecol Scand*. 2003;82(2):182-188.
104. Tolstrup JS, Munk C, Madsen LB, Ottesen B, Bergholt T, Gronbaek M. Does caffeine and alcohol intake before pregnancy predict the occurrence of spontaneous abortion? *Hum Reprod*. 2003;18(12):2704-2710.
105. Bech BH, Nohr EA, Vaeth M, Henriksen TB, Olsen J. Coffee and fetal death: a cohort study with prospective data. *Am J Epidemiol*. 2005;162(10):983-990.
106. Sata F, Yamada H, Suzuki K, et al. Caffeine intake, CYP1A2 polymorphism and the risk of recurrent pregnancy loss. *Mol Hum Reprod*. 2005;11(5):357-360.
107. George L, Granath F, Johansson AL, Olander B, Cnattingius S. Risks of repeated miscarriage. *Paediatr Perinat Epidemiol*. 2006;20(2):119-126.
108. Maconochie N, Doyle P, Prior S, Simmons R. Risk factors for first trimester miscarriage-results from a UK-population-based case-control study. *BJOG*. 2007;114(2):170-186.
109. Savitz DA, Chan RL, Herring AH, Howards PP, Hartmann KE. Caffeine and miscarriage risk. *Epidemiology*. 2008;19(1):55-62.
110. Weng X, Odouli R, Li DK. Maternal caffeine consumption during pregnancy and the risk of miscarriage: a prospective cohort study. *Am J Obstet Gynecol*. 2008;198(3):279 e271-278.
111. Agnesi R, Valentini F, Fedeli U, et al. Maternal exposures and risk of spontaneous abortion before and after a community oriented health education campaign. *Eur J Public Health*. 2010;21(3):282-285.

112. Greenwood DC, Alwan N, Boylan S, et al. Caffeine intake during pregnancy, late miscarriage and stillbirth. *Eur J Epidemiol.* 2010;25(4):275-280.
113. Hahn KA, Wise LA, Rothman KJ, et al. Caffeine and caffeinated beverage consumption and risk of spontaneous abortion. *Hum Reprod.* 2015;30(5):1246-1255.
114. Klonoff-Cohen H, Bleha J, Lam-Kruglick P. A prospective study of the effects of female and male caffeine consumption on the reproductive endpoints of IVF and gamete intra-Fallopian transfer. *Hum Reprod.* 2002;17(7):1746-1754.
115. Al-Saleh I, El-Doush I, Griselli B, Coskun S. The effect of caffeine consumption on the success rate of pregnancy as well various performance parameters of in-vitro fertilization treatment. *Medical science monitor : international medical journal of experimental and clinical research.* 2010;16(12):CR598-605.
116. Choi JH, Ryan LM, Cramer DW, Hornstein MD, Missmer SA. Effects of Caffeine Consumption by Women and Men on the Outcome of In Vitro Fertilization. *J Caffeine Res.* 2011;1(1):29-34.
